# Supplementary material for: Implementing structured follow-up of neonatal and paediatric patients: an evaluation of three university hospital case studies using the functional resonance analysis method
Source: Springer Nature journal article supplement (doi:10.1186/s12913-022-07537-x), 2022-02-13
Supplement: MOESM1 [file 20131098]

# **Implementing structured follow-up of neonatal and paediatric patients: an evaluation of three university hospital case studies using the functional resonance analysis method**

## **Authors**

Véronique Bos<sup>1</sup>, Daniëlle Roorda<sup>2</sup>, Eleonore de Sonnaville<sup>3</sup>, Menne van Boven<sup>4</sup>, Jaap Oosterlaan<sup>5</sup>, Johannes van Goudoever<sup>5</sup>, Niek Klazinga<sup>1</sup> and Dionne Kringos<sup>1</sup>

<sup>1</sup> Department of Public and Occupational Health, Amsterdam UMC, University of Amsterdam; and Amsterdam Public Health Research Institute, Amsterdam, Netherlands

<sup>2</sup> Department of Pediatric Surgery, Emma Children's Hospital, Amsterdam UMC, University of Amsterdam and Vrije Universiteit; and Amsterdam Reproduction and Development, Amsterdam, Netherlands

<sup>3</sup> Pediatric Intensive Care Unit, Emma Children's Hospital, Amsterdam UMC, University of Amsterdam, Amsterdam, Netherlands

<sup>4</sup> Neonatal Intensive Care Unit, Emma Children's Hospital, Amsterdam UMC, University of Amsterdam, Amsterdam, Netherlands

<sup>5</sup> Follow Me Programme and Emma Neuroscience Group, Department of Pediatrics, Emma Children's Hospital, Amsterdam UMC, University of Amsterdam; and Amsterdam Reproduction and Development, Amsterdam, Netherlands

## **Corresponding author**

Véronique Bos

Department of Public and Occupational Health

Amsterdam Medical Centre, Amsterdam UMC

University of Amsterdam

Meibergdreef 9

1105 AZ Amsterdam

Netherlands

Email: [v.i.bos@amsterdamumc.nl](mailto:v.i.bos@amsterdamumc.nl)

## Additional file 1 – COREQ checklist

### Domain 1: Research team and reflexivity

#### Personal Characteristics

| Nr | Item                    | Guide question/description                             |                                                                |
|----|-------------------------|--------------------------------------------------------|----------------------------------------------------------------|
| 1  | Interviewer/facilitator | Which author/s conducted the interview or focus group? | VB                                                             |
| 2  | Credentials             | What were the researcher's credentials? E.g. PhD, MD   | BSc, MA                                                        |
| 3  | Occupation              | What was their occupation at the time of the study?    | PhD candidate                                                  |
| 4  | Gender                  | Was the researcher male or female?                     | female                                                         |
| 5  | Experience and training | What experience or training did the researcher have?   | Experienced in interviews for research purposes, FRAM training |

#### Relationship with participants

| Nr | Item                                     | Guide question/description                                                                                                                |                                                                                                                                                                        |
|----|------------------------------------------|-------------------------------------------------------------------------------------------------------------------------------------------|------------------------------------------------------------------------------------------------------------------------------------------------------------------------|
| 6  | Relationship established                 | Was a relationship established prior to study commencement?                                                                               | Before the start of the study, the study and VB were introduced to the teams via an A4 communication and a column in a well-read weekly newsletter of the departments. |
| 7  | Participant knowledge of the interviewer | What did the participants know about the researcher? e.g. personal goals, reasons for doing the research                                  | In the communication the background of the interviewer was listed, as well as research goals.                                                                          |
| 8  | Interviewer characteristics              | What characteristics were reported about the interviewer/facilitator? e.g. Bias, assumptions, reasons and interests in the research topic | The background of the interviewer in operational management was communicated as well as her affiliation with the hospital environment.                                 |

### Domain 2: study design

#### Theoretical framework

| Nr | Item                                  | Guide question/description                                                                                                                               |                                                                          |
|----|---------------------------------------|----------------------------------------------------------------------------------------------------------------------------------------------------------|--------------------------------------------------------------------------|
| 9  | Methodological orientation and Theory | What methodological orientation was stated to underpin the study? e.g. grounded theory, discourse analysis, ethnography, phenomenology, content analysis | The FRAM was used. The FRAM has a background in the Safety-2 philosophy. |

#### Participant selection

| Nr | Item | Guide question/description |  |
|----|------|----------------------------|--|
|    |      |                            |  |

|    |                    |                                                                                    |                                                                                                                                                                             |
|----|--------------------|------------------------------------------------------------------------------------|-----------------------------------------------------------------------------------------------------------------------------------------------------------------------------|
| 10 | Sampling           | How were participants selected? e.g. purposive, convenience, consecutive, snowball | Purposive sampling was done, with the request to evaluate the implementation of the Follow Me programme.                                                                    |
| 11 | Method of approach | How were participants approached? e.g. face-to-face, telephone, mail, email        | The Follow Me project team contacted the clinical leads of the policlinic per department and observations were scheduled through them.                                      |
| 12 | Sample size        | How many participants were in the study?                                           | Three departments were included in this study                                                                                                                               |
| 13 | Non-participation  | How many people refused to participate or dropped out? Reasons?                    | All invited interviewees chose to participate in the study. All care providers, patients and their families agreed to the observations for the study when asked beforehand. |

#### Setting

| Nr | Item                         | Guide question/description                                                        |                                                                                                                                                                                                               |
|----|------------------------------|-----------------------------------------------------------------------------------|---------------------------------------------------------------------------------------------------------------------------------------------------------------------------------------------------------------|
| 14 | Setting of data collection   | Where was the data collected? e.g. home, clinic, workplace                        | The interviews were conducted in the hospital, the observations were conducted in the outpatient clinic. Due to COVID-19 restrictions two evaluation meetings with departments had to be scheduled digitally. |
| 15 | Presence of non-participants | Was anyone else present besides the participants and researchers?                 | no                                                                                                                                                                                                            |
| 16 | Description of sample        | What are the important characteristics of the sample? e.g. demographic data, date | Different age categories of patients were included in the observations reflecting the different content of the programme per age group.                                                                       |

#### Data collection

| Nr | Item              | Guide question/description                                                    |                                                                                                                    |
|----|-------------------|-------------------------------------------------------------------------------|--------------------------------------------------------------------------------------------------------------------|
| 17 | Interview guide   | Were questions, prompts, guides provided by the authors? Was it pilot tested? | The FRAM interview guide from Hollnagel and colleagues was used.                                                   |
| 18 | Repeat interviews | Were repeat interviews carried out? If yes, how many?                         | No, however some questions that could not be answered during observations were answered at a later moment in time. |

|    |                        |                                                                          |                                                                                                                                                              |
|----|------------------------|--------------------------------------------------------------------------|--------------------------------------------------------------------------------------------------------------------------------------------------------------|
| 19 | Audio/visual recording | Did the research use audio or visual recording to collect the data?      | Interviews were audio recorded, observations were not audio/visually recorded.                                                                               |
| 20 | Field notes            | Were field notes made during and/or after the interview or focus group?  | The field notes of the observations were guided by FRAM template (Additional file 2)                                                                         |
| 21 | Duration               | What was the duration of the interviews or focus group?                  | The duration of the interviews were 15-39 minutes.                                                                                                           |
| 22 | Data saturation        | Was data saturation discussed?                                           | Teams were actively involved in the validation of the findings via improvement sessions in order to capitalize on their daily experience with the programme. |
| 23 | Transcripts returned   | Were transcripts returned to participants for comment and/or correction? | Transcripts were not made.                                                                                                                                   |

### Domain 3: analysis and findings

#### Data analysis

| Nr | Item                           | Guide question/description                                  |                                                                                                                                                           |
|----|--------------------------------|-------------------------------------------------------------|-----------------------------------------------------------------------------------------------------------------------------------------------------------|
| 24 | Number of data coders          | How many data coders coded the data?                        | One researcher VB coded the data into functions and aspects.                                                                                              |
| 25 | Description of the coding tree | Did authors provide a description of the coding tree?       | Data use per model is available (Additional file 3), as well as source of data per function and aspect in all models (available upon reasonable request). |
| 26 | Derivation of themes           | Were themes identified in advance or derived from the data? | All authors agreed on foreground-background coding themes.                                                                                                |
| 27 | Software                       | What software, if applicable, was used to manage the data?  | The FRAM Model Visualizer (FMV) software, version 2.1.0, was used to shape the models                                                                     |
| 28 | Participant checking           | Did participants provide feedback on the findings?          | Yes, improvement sessions were organized with all departments to discuss and provide feedback on the findings.                                            |

#### Reporting

| Nr | Item                 | Guide question/description                                                                                                        |                                                                                                                              |
|----|----------------------|-----------------------------------------------------------------------------------------------------------------------------------|------------------------------------------------------------------------------------------------------------------------------|
| 29 | Quotations presented | Were participant quotations presented to illustrate the themes / findings? Was each quotation identified? e.g. participant number | No direct quotations were made. All functions and aspects included in the models can be traced back to the source (document, |

|    |                              |                                                                        |                                                                                                                                                                 |
|----|------------------------------|------------------------------------------------------------------------|-----------------------------------------------------------------------------------------------------------------------------------------------------------------|
|    |                              |                                                                        | interview, or observation) via the research log.                                                                                                                |
| 30 | Data and findings consistent | Was there consistency between the data presented and the findings?     | Yes, data could all be incorporated in the FRAM models which reached consensus with the participants.                                                           |
| 31 | Clarity of major themes      | Were major themes clearly presented in the findings?                   | Models were used to give a broad overview of work-as-imagined or work-as-done. The themes questioned using the FRAM models were clearly answered by the models. |
| 32 | Clarity of minor themes      | Is there a description of diverse cases or discussion of minor themes? | Yes, occurrences in the data, however small, were included in the models and discussed in the improvement sessions to validate relevance.                       |
