# Supplementary material for: Implementing structured follow-up of neonatal and paediatric patients: an evaluation of three university hospital case studies using the functional resonance analysis method
Source: Springer Nature journal article supplement (doi:10.1186/s12913-022-07537-x), 2022-02-13
Supplement: MOESM2 [file 20131098]

# **Implementing structured follow-up of neonatal and paediatric patients: an evaluation of three university hospital case studies using the functional resonance analysis method**

## **Authors**

Véronique Bos<sup>1</sup>, Daniëlle Roorda<sup>2</sup>, Eleonore de Sonnaville<sup>3</sup>, Menne van Boven<sup>4</sup>, Jaap Oosterlaan<sup>5</sup>, Johannes van Goudoever<sup>5</sup>, Niek Klazinga<sup>1</sup> and Dionne Kringos<sup>1</sup>

<sup>1</sup> Department of Public and Occupational Health, Amsterdam UMC, University of Amsterdam; and Amsterdam Public Health Research Institute, Amsterdam, Netherlands

<sup>2</sup> Department of Pediatric Surgery, Emma Children's Hospital, Amsterdam UMC, University of Amsterdam and Vrije Universiteit; and Amsterdam Reproduction and Development, Amsterdam, Netherlands

<sup>3</sup> Pediatric Intensive Care Unit, Emma Children's Hospital, Amsterdam UMC, University of Amsterdam, Amsterdam, Netherlands

<sup>4</sup> Neonatal Intensive Care Unit, Emma Children's Hospital, Amsterdam UMC, University of Amsterdam, Amsterdam, Netherlands

<sup>5</sup> Follow Me Programme and Emma Neuroscience Group, Department of Pediatrics, Emma Children's Hospital, Amsterdam UMC, University of Amsterdam; and Amsterdam Reproduction and Development, Amsterdam, Netherlands

## **Corresponding author**

Véronique Bos

Department of Public and Occupational Health

Amsterdam Medical Centre, Amsterdam UMC

University of Amsterdam

Meibergdreef 9

1105 AZ Amsterdam

Netherlands

Email: [v.i.bos@amsterdamumc.nl](mailto:v.i.bos@amsterdamumc.nl)

**Additional file 2 - Template observations**

<function> :

|                              |  |
|------------------------------|--|
| <b>Input</b>                 |  |
| <b>Output</b>                |  |
| <b>Variability of output</b> |  |
| <b>Pre-condition</b>         |  |
| <b>Resources</b>             |  |
| <b>Control</b>               |  |
| <b>Time</b>                  |  |
