# Supplementary material for: Implementing structured follow-up of neonatal and paediatric patients: an evaluation of three university hospital case studies using the functional resonance analysis method
Source: Springer Nature journal article supplement (doi:10.1186/s12913-022-07537-x), 2022-02-13
Supplement: MOESM3 [file 20131098]

# **Implementing structured follow-up of neonatal and paediatric patients: an evaluation of three university hospital case studies using the functional resonance analysis method**

## **Authors**

Véronique Bos<sup>1</sup>, Daniëlle Roorda<sup>2</sup>, Eleonore de Sonnaville<sup>3</sup>, Menne van Boven<sup>4</sup>, Jaap Oosterlaan<sup>5</sup>, Johannes van Goudoever<sup>5</sup>, Niek Klazinga<sup>1</sup> and Dionne Kringos<sup>1</sup>

<sup>1</sup> Department of Public and Occupational Health, Amsterdam UMC, University of Amsterdam; and Amsterdam Public Health Research Institute, Amsterdam, Netherlands

<sup>2</sup> Department of Pediatric Surgery, Emma Children's Hospital, Amsterdam UMC, University of Amsterdam and Vrije Universiteit; and Amsterdam Reproduction and Development, Amsterdam, Netherlands

<sup>3</sup> Pediatric Intensive Care Unit, Emma Children's Hospital, Amsterdam UMC, University of Amsterdam, Amsterdam, Netherlands

<sup>4</sup> Neonatal Intensive Care Unit, Emma Children's Hospital, Amsterdam UMC, University of Amsterdam, Amsterdam, Netherlands

<sup>5</sup> Follow Me Programme and Emma Neuroscience Group, Department of Pediatrics, Emma Children's Hospital, Amsterdam UMC, University of Amsterdam; and Amsterdam Reproduction and Development, Amsterdam, Netherlands

## **Corresponding author**

Véronique Bos

Department of Public and Occupational Health

Amsterdam Medical Centre, Amsterdam UMC

University of Amsterdam

Meibergdreef 9

1105 AZ Amsterdam

Netherlands

Email: [v.i.bos@amsterdamumc.nl](mailto:v.i.bos@amsterdamumc.nl)

### Additional file 3 – Data use per model

| Data Work-as-Imagined (code: DOC + #)      |                    |                                                                                                                                                                                                                                                                                                                                                                                            |
|--------------------------------------------|--------------------|--------------------------------------------------------------------------------------------------------------------------------------------------------------------------------------------------------------------------------------------------------------------------------------------------------------------------------------------------------------------------------------------|
| Internal documents (code D + #)            | General            | <ol style="list-style-type: none"> <li>1. Follow Me – missie, visie en strategie (Amsterdam UMC)</li> <li>2. Werkwijze Follow Me programma</li> <li>3. Follow Me klinische les polikliniek presentatie</li> <li>4. Follow Me outline</li> <li>5. Presentatie themadag verpleegkundigen Follow Me</li> <li>6. Waarom Follow Me? (Amsterdam UMC)</li> </ol>                                  |
|                                            | NICU               | <ol style="list-style-type: none"> <li>7. Follow Me neonatologie polistafoverleg presentatie</li> <li>8. Totaaloverzicht protocollen Follow Me NICU</li> </ol>                                                                                                                                                                                                                             |
|                                            | PICU               | <ol style="list-style-type: none"> <li>9. Concept follow up protocol IC Kinderen (werkgroep follow me werkgroep IC kinderen)</li> <li>10. Follow Me polikliniek Intensive Care Kinderen; informatie voor ouders (secretariaat van de afdeling Intensive Care Kinderen, locatie Meibergdreef (Emma Kinderziekenhuis))</li> </ol>                                                            |
|                                            | Paediatric surgery | <ol style="list-style-type: none"> <li>11. Follow Me Polikliniek Aangeboren Aandoeningen; informatie voor ouders (Follow Me casemanagers)</li> </ol>                                                                                                                                                                                                                                       |
| External documents (code D + #)            | General            | <ol style="list-style-type: none"> <li>12. Follow Me programma poster</li> </ol>                                                                                                                                                                                                                                                                                                           |
|                                            | NICU               | <ol style="list-style-type: none"> <li>13. Aanbevelingen Landelijke Neonatale Follow-up – NICU follow-up (2015, werkgroep Landelijke Neonatale Follow-up)</li> <li>14. <a href="http://www.landelijkeneonatalefollowup.nl">www.landelijkeneonatalefollowup.nl</a></li> </ol>                                                                                                               |
|                                            | PICU               | <ol style="list-style-type: none"> <li>15. Richtlijn follow-up van kinderen na opname op een intensive care (2017, SICK, NVK)</li> </ol>                                                                                                                                                                                                                                                   |
| Interviews Work-as-Imagined (code INT + #) | General            | <p>Steering group Follow Me:</p> <ol style="list-style-type: none"> <li>1. Director van het Follow Me programme &amp; Steering group member Follow Me programme</li> <li>2. Project coordinator Follow Me programme &amp; Steering group member Follow Me programme</li> <li>3. Steering group member Follow Me programme</li> <li>4. Steering group member Follow Me programme</li> </ol> |
|                                            | NICU               | <ol style="list-style-type: none"> <li>5. Coordinating PhD Follow Me NICU</li> <li>6. Head of department NICU</li> </ol>                                                                                                                                                                                                                                                                   |
|                                            | PICU               | <ol style="list-style-type: none"> <li>7. Coordinating PhD Follow Me PICU</li> <li>8. Head of department PICU</li> </ol>                                                                                                                                                                                                                                                                   |
|                                            | Paediatric surgery | <ol style="list-style-type: none"> <li>9. Coordinating PhD Follow Me paediatric surgery</li> <li>10. Head of department paediatric surgery</li> </ol>                                                                                                                                                                                                                                      |

| Data Work-as-Done           |                            |                                                                                                                                                                                           |
|-----------------------------|----------------------------|-------------------------------------------------------------------------------------------------------------------------------------------------------------------------------------------|
| Observations (code OBS + #) | NICU location Meibergdreef | <ol style="list-style-type: none"> <li>1. 28<sup>th</sup> October 2019 – neonatologist &amp; paediatric psychologist</li> <li>2. 21<sup>st</sup> November 2019 – neonatologist</li> </ol> |
|                             | NICU location Boelelaan    | <ol style="list-style-type: none"> <li>3. 1<sup>st</sup> November 2019 –psychologist, neonatologist, physiotherapist</li> </ol>                                                           |

|                                     |                    |                                                                                                                                                                                                                                                                                         |
|-------------------------------------|--------------------|-----------------------------------------------------------------------------------------------------------------------------------------------------------------------------------------------------------------------------------------------------------------------------------------|
|                                     |                    | 4. 19 <sup>th</sup> November 2019 – doctor’s assistant, neonatologist, physiotherapist                                                                                                                                                                                                  |
|                                     | PICU               | 5. 27 <sup>th</sup> September 2019 –paediatric intensivist, psychologist, revalidation specialist, paediatric pulmonologist.<br>6. 11 <sup>th</sup> October 2019 – paediatric intensivist                                                                                               |
|                                     | Paediatric surgery | 7. 8 <sup>th</sup> October 2019 –paediatric surgeon, PhD coordinator Follow Me programme PSU, physiotherapists specialized in children development, specialized nurse)<br>8. 25 <sup>th</sup> October 2019 – paediatric surgeon, physiotherapist specialized in paediatric development) |
| Department meetings<br>(code M + #) | NICU               | 1. 25 <sup>th</sup> May 2020 – FRAM evaluation session for both locations together                                                                                                                                                                                                      |
|                                     | PICU               | 2. 28 <sup>th</sup> May 2020 – yearly evaluating outcomes follow me PICU and FRAM evaluation<br>3. 6 <sup>th</sup> July 2020 – reflecting on evaluating session and decide on areas for improvement                                                                                     |
|                                     | Paediatric surgery | 4. 27 <sup>th</sup> January 2020 – yearly evaluating outcomes follow me paediatric surgery and FRAM evaluation<br>5. 9 <sup>th</sup> March 2020 – reflecting on evaluating session and decide on areas for improvement                                                                  |
| Documents<br>(code D + #)           | NICU               | -                                                                                                                                                                                                                                                                                       |
|                                     | PICU               | 17. Presentation ‘Verbetersessie 2020 intensive care kinderen’                                                                                                                                                                                                                          |
|                                     | Paediatric surgery | 18. Outcomes patient satisfaction survey Follow Me paediatric surgery                                                                                                                                                                                                                   |
