# Supplementary material for: Implementing structured follow-up of neonatal and paediatric patients: an evaluation of three university hospital case studies using the functional resonance analysis method
Source: Springer Nature journal article supplement (doi:10.1186/s12913-022-07537-x), 2022-02-13
Supplement: MOESM4 [file 20131098]

# **Implementing structured follow-up of neonatal and paediatric patients: an evaluation of three university hospital case studies using the functional resonance analysis method**

## **Authors**

Véronique Bos<sup>1</sup>, Daniëlle Roorda<sup>2</sup>, Eleonore de Sonnaville<sup>3</sup>, Menne van Boven<sup>4</sup>, Jaap Oosterlaan<sup>5</sup>, Johannes van Goudoever<sup>5</sup>, Niek Klazinga<sup>1</sup> and Dionne Kringos<sup>1</sup>

<sup>1</sup> Department of Public and Occupational Health, Amsterdam UMC, University of Amsterdam; and Amsterdam Public Health Research Institute, Amsterdam, Netherlands

<sup>2</sup> Department of Pediatric Surgery, Emma Children's Hospital, Amsterdam UMC, University of Amsterdam and Vrije Universiteit; and Amsterdam Reproduction and Development, Amsterdam, Netherlands

<sup>3</sup> Pediatric Intensive Care Unit, Emma Children's Hospital, Amsterdam UMC, University of Amsterdam, Amsterdam, Netherlands

<sup>4</sup> Neonatal Intensive Care Unit, Emma Children's Hospital, Amsterdam UMC, University of Amsterdam, Amsterdam, Netherlands

<sup>5</sup> Follow Me Programme and Emma Neuroscience Group, Department of Pediatrics, Emma Children's Hospital, Amsterdam UMC, University of Amsterdam; and Amsterdam Reproduction and Development, Amsterdam, Netherlands

## **Corresponding author**

Véronique Bos

Department of Public and Occupational Health

Amsterdam Medical Centre, Amsterdam UMC

University of Amsterdam

Meibergdreef 9

1105 AZ Amsterdam

Netherlands

Email: [v.i.bos@amsterdamumc.nl](mailto:v.i.bos@amsterdamumc.nl)

## Additional file 4 – Functions generating data and their aspects

Table 1: Work-as-Imagined Follow Me programme - functions generating follow-up data

| Function                           | Aspects (Input, Output, Precondition, Resource, Control, and Time)                                                                                                                                                                                                                                                                                                                                                                                                                                                                                                                                                                                                                                                                                                                                                                                |
|------------------------------------|---------------------------------------------------------------------------------------------------------------------------------------------------------------------------------------------------------------------------------------------------------------------------------------------------------------------------------------------------------------------------------------------------------------------------------------------------------------------------------------------------------------------------------------------------------------------------------------------------------------------------------------------------------------------------------------------------------------------------------------------------------------------------------------------------------------------------------------------------|
| 2) to collect PROMs                | <p>I: Invite to questionnaire(s)</p> <p><b>O: PROMs collected</b></p> <p>P: Questionnaires accessible in KLIK software or 'Mijn Dossier' (patient portal in electronic health record), patient access to KLIK or 'Mijn Dossier' (all preconditions modelled as accessible questionnaires)</p> <p>R: KLIK, 'Mijn Dossier' (modelled as EHR), patient (from age 8 years) or parents (parent proxy measurements)</p> <p>C: none observed</p> <p>T: 2 weeks before appointment at outpatient standardized follow-up programme</p>                                                                                                                                                                                                                                                                                                                     |
| 3) to conduct outpatient follow-up | <p>I: schedule</p> <p><b>O: standardized multidisciplinary follow-up patient data collected</b>, new initiatives, referrals further individual treatment, knowledge about long term outcomes of individual patients treated</p> <p>P: financing, commitment involved care professionals, support hospital, support IT, workspace</p> <p>R: EHR (EPIC questionnaires, report of the day, 'Smart text'),</p> <p>C: completeness of data, multidisciplinary team (present in multidisciplinary meeting), protocol per department and condition/disease/treatment infant/child, potential complaints, ad hoc interventions needed by project team, expertise centrum, follow-up %, patient satisfaction, word of mouth patient families</p> <p>T: last follow-up 17 years of age, standardized times to be comparable (both modelled as protocol)</p> |
| 4) to adjust treatment or guidance | <p>I: referral from follow Me</p> <p><b>O: Quality of life outcomes after adjusted treatment due to follow-up</b></p> <p>P: none observed</p> <p>R: none observed</p> <p>C: none observed</p> <p>T: preventive/ timely (asap) proactive due to follow up</p>                                                                                                                                                                                                                                                                                                                                                                                                                                                                                                                                                                                      |

Table 2: Work-as-Done functions of the neonatal ICU, location Meibergdreef, generating follow-up data

| Function                                      | Aspects (Input, Output, Precondition, Resource, Control, and Time)                                                                                                                                                                                                                                                                                                                                                                                                                                                                                                                                                                                                                                                                                                                                                    |
|-----------------------------------------------|-----------------------------------------------------------------------------------------------------------------------------------------------------------------------------------------------------------------------------------------------------------------------------------------------------------------------------------------------------------------------------------------------------------------------------------------------------------------------------------------------------------------------------------------------------------------------------------------------------------------------------------------------------------------------------------------------------------------------------------------------------------------------------------------------------------------------|
| 2) to collect PROMs                           | <p>I: invite</p> <p><b>O: PROMs</b></p> <p>P: none observed</p> <p>R: none observed</p> <p>C: reminder about two weeks in advance</p> <p>T: none observed</p>                                                                                                                                                                                                                                                                                                                                                                                                                                                                                                                                                                                                                                                         |
| 3) to conduct follow-up programme (clinician) | <p>I: patient at outpatient clinic</p> <p>O: consent form for research purposes</p> <p>O: informed patient/family about motor development, growth development, general wellbeing and potential medical complaints</p> <p><b>O: patient data registered on motor development, growth development, general wellbeing and medical complaints</b></p> <p>O: handover to psychologist</p> <p>O: referral to other medical treatment when necessary</p> <p>P: schedule</p> <p>R: pre-scripted questions in EHR on general wellbeing, movement assessment battery for children (OBS1), Movement ABC (OBS2), scale and measuring tape, EHR, trained medical doctors specialized in neonatal check ups</p> <p>C: none observed</p> <p>T: takes about 1.5 hours (patient (child) asks parents how much longer it will take)</p> |

|                                                  |                                                                                                                                                                                                                                                                                                                                                                                 |
|--------------------------------------------------|---------------------------------------------------------------------------------------------------------------------------------------------------------------------------------------------------------------------------------------------------------------------------------------------------------------------------------------------------------------------------------|
| 4) to conduct follow-up programme (psychologist) | <p>I: patient at outpatient clinic</p> <p><b>O: patient data on cognitive development</b>, referral when necessary</p> <p>P: schedule</p> <p>R: trained psychologist, PROMs, informed psychologist on clinical follow up, BSID-III-NL (24 months of age), WPPSI-II-NL (5,5 years of age), WISC-V-NL (8 years of age)</p> <p>C: none observed</p> <p>T: duration 1.5-2 hours</p> |
|--------------------------------------------------|---------------------------------------------------------------------------------------------------------------------------------------------------------------------------------------------------------------------------------------------------------------------------------------------------------------------------------------------------------------------------------|

Table 3 Work-as-Done functions neonatal ICU, location Boelelaan, generating follow-up data

| Function                                             | Aspects (Input, Output, Precondition, Resource, Control, and Time)                                                                                                                                                                                                                                                                                                                                                                         |
|------------------------------------------------------|--------------------------------------------------------------------------------------------------------------------------------------------------------------------------------------------------------------------------------------------------------------------------------------------------------------------------------------------------------------------------------------------------------------------------------------------|
| 3) to collect PROMs                                  | <p>I: invite</p> <p><b>O: paper based PROMs</b></p> <p>P: none observed</p> <p>R: paper based questionnaires ('Lexilijst Nederlands', behavioural questionnaire for children 1.5 until 5 years of age)</p> <p>C: none observed</p> <p>T: none observed</p>                                                                                                                                                                                 |
| 6) to conduct follow-up (psychologist)               | <p>I: patient in waiting room (digital cue in EHR scheduling module, modelled as EHR)</p> <p><b>O: patient data on cognitive development on paper</b>, refer to desk to check in for further follow up</p> <p>P: schedule</p> <p>R: CBCL/'lexilijsten', patient summary, paper checklist, EHR, trained medical psychologist in neonatal follow-up, Bayley scales of infant development</p> <p>C: none observed</p> <p>T: none observed</p> |
| 9) to weigh and measure patient (doctor's assistant) | <p>I: patient at outpatient clinic</p> <p><b>O: handover from doctor's assistant, patient data on growth development in EHR</b></p> <p>P: none observed</p> <p>R: scale, measuring tape, EHR, trained doctor's assistant, patient, general questionnaire in EHR (modelled as EHR)</p> <p>C: none observed</p> <p>T: none observed</p>                                                                                                      |
| 10) to conduct follow-up (neonatologist)             | <p>I: patient in waiting room (digital cue in EHR scheduling module) and handover from doctor's assistant</p> <p><b>O: patient data registered on growth development (when doctor's assistant is absent), general wellbeing and medical complaints</b></p> <p>P: schedule</p> <p>R: EHR, trained specialized in neonatal care, scale and measuring tape, patient summary</p> <p>C: none observed</p> <p>T: none observed</p>               |
| 11) to conduct follow-up (physiotherapist)           | <p>I: coordination doctor's assistant</p> <p><b>O: patient data registered on motor development on paper</b>, feedback patient on motor development</p> <p>P: schedule</p> <p>R: trained physiotherapist specialized in neonatal follow-up, patient summary, TOP results (physiotherapy primary care), Alberta infant motor scale</p> <p>C: none observed</p> <p>T: none observed</p>                                                      |

Table 4 Work-as-Done functions paediatric ICU generating follow-up data

| Function            | Aspects (Input, Output, Precondition, Resource, Control, and Time)                                                                                                                              |
|---------------------|-------------------------------------------------------------------------------------------------------------------------------------------------------------------------------------------------|
| 2) to collect PROMs | <p>I: invite (to KLIK system)</p> <p><b>O: PROMs in KLIK system</b></p> <p>P: none observed</p> <p>R: KLIK system containing questionnaires</p> <p>C: none observed</p> <p>T: none observed</p> |

|                                                      |                                                                                                                                                                                                                                                                                                                                                                                                                      |
|------------------------------------------------------|----------------------------------------------------------------------------------------------------------------------------------------------------------------------------------------------------------------------------------------------------------------------------------------------------------------------------------------------------------------------------------------------------------------------|
| 3) to weigh and measure patient (doctor's assistant) | I: patient at outpatient clinic<br>O: <b>patient data on weight, blood pressure and measurement in electronic health record (EHR)</b><br>P: none observed<br>R: scale, measuring tape, EHR, trained doctors assistant, patient, blood pressure measurement instrument<br>C: call from doctor in the case of no show, to offer standardized follow-up programme (clinician) check on measurements<br>T: none observed |
| 5) to conduct follow-up (paediatric intensivist)     | I: patient in waiting room<br>O: <b>patient data registered on general wellbeing, medical complaints, cognitive and motor development</b><br>O: check on weight and measure patient<br>O: referral<br>P: schedule<br>R: EHR<br>C: none observed<br>T: approx. 30 min per consult per patient (2.5 hours for neuropsychological consult)                                                                              |
| 7) to conduct follow-up (psychologist)               | I: hand-over from clinician<br>O: <b>referral, EHR free text</b><br>P: none observed<br>R: PROMs, trained medical psychologist<br>C: none observed<br>T: none observed                                                                                                                                                                                                                                               |

Table 5 Work-as-Done functions paediatric surgery generating follow-up data

| Function                                                                | Aspects                                                                                                                                                                                                                                                                         |
|-------------------------------------------------------------------------|---------------------------------------------------------------------------------------------------------------------------------------------------------------------------------------------------------------------------------------------------------------------------------|
| 2) to collect PROMs                                                     | I: invite to KLIK system, invite to 'Mijn dossier' questionnaire<br>O: <b>PROMs on psychosocial indicators in KLIK system, PROMs on medical indicators in EHR</b><br>P: none observed<br>R: KLIK programme, EHR patient portal access<br>C: none observed<br>T: none observed   |
| 3) to weigh and measure patient (doctor's assistant)                    | I: patient at outpatient clinic<br>O: <b>patient data on weight and measurement in EHR</b><br>P: schedule<br>R: scale, measuring tape, EHR, trained doctor's assistant, patient<br>C: none observed<br>T: none observed                                                         |
| 4) to conduct follow-up (specialized nurse)                             | I: schedule<br>O: <b>patient data on general wellbeing</b><br>P: patient present in waiting room<br>R: patient data on weight and measurement in EHR, interpreter phone, template general wellbeing questions, trained nurse<br>C: none observed<br>T: none observed            |
| 5) to conduct follow-up (paediatric surgeon)                            | I: schedule<br>O: <b>patient data on medical indicators in EHR</b><br>P: patient present in waiting room<br>R: patient, HER<br>C: none observed<br>T: none observed                                                                                                             |
| 6) to conduct follow-up (paediatric gastroenterologist; when indicated) | I: schedule<br>O: <b>patient data on gastrointestinal development in EHR</b> (modelled as patient data on medical indicators)<br>P: patient present in waiting room<br>R: interpreter phone, EHR, trained paediatric gastroenterologist<br>C: none observed<br>T: none observed |

|                                                                    |                                                                                                                                                                                                                                                                          |
|--------------------------------------------------------------------|--------------------------------------------------------------------------------------------------------------------------------------------------------------------------------------------------------------------------------------------------------------------------|
| 7) to conduct follow-up (paediatric pulmonologist; when indicated) | I: schedule<br>O: <b>patient data on pulmonological development in EHR</b> (modelled as patient data on medical indicators)<br>P: patient present in waiting room<br>R: interpreter phone, EHR, trained paediatric pulmonologist<br>C: none observed<br>T: none observed |
| 8) to conduct follow-up (physiotherapist)                          | I: schedule<br>O: <b>patient data on motor development in EHR</b><br>P: patient in waiting room<br>R: Alberta infant motor scales (AIMS), Bayley Scale of Infant Development (BSID), EHR, physiotherapist<br>C: none observed<br>T: none observed                        |
| 9) to conduct follow-up (medical psychologist)                     | I: schedule<br>O: none observed<br>P: patient in waiting room<br>R: PROMs, KLIK system, EHR<br>C: none observed<br>T: none observed                                                                                                                                      |
